# Supplementary material
Source: publisher figshare collection journal article supplement (https://gsajournals.figshare.com/articles/dataset/_/14114234)
Supplement: Supplementary file 1 [file 1]

## Sheet: Table S1
Single Family Stepwise Regression QTL Mapping
RILs used in d13C Analysis					RILs used in SLA Analysis					RILs used in Elemental Analysis
CML103	CML333	Nc358	Tx303		CML103	CML333	Nc358	Tx303		CML103	CML333	Nc358	Tx303
Z002E0001	Z007E0001	Z021E0001	Z025E0001		Z002E0001	Z007E0001	Z021E0002	Z025E0001		Z002E0001	Z007E0001	Z021E0001	Z025E0001
Z002E0002	Z007E0002	Z021E0002	Z025E0002		Z002E0002	Z007E0002	Z021E0003	Z025E0002		Z002E0002	Z007E0002	Z021E0002	Z025E0002
Z002E0003	Z007E0003	Z021E0003	Z025E0003		Z002E0003	Z007E0003	Z021E0004	Z025E0003		Z002E0003	Z007E0003	Z021E0003	Z025E0003
Z002E0004	Z007E0004	Z021E0004	Z025E0004		Z002E0004	Z007E0004	Z021E0005	Z025E0004		Z002E0004	Z007E0004	Z021E0004	Z025E0004
Z002E0005	Z007E0005	Z021E0005	Z025E0005		Z002E0005	Z007E0005	Z021E0006	Z025E0005		Z002E0005	Z007E0005	Z021E0005	Z025E0005
Z002E0006	Z007E0007	Z021E0006	Z025E0006		Z002E0006	Z007E0007	Z021E0008	Z025E0006		Z002E0006	Z007E0007	Z021E0006	Z025E0006
Z002E0007	Z007E0009	Z021E0008	Z025E0007		Z002E0007	Z007E0008	Z021E0009	Z025E0007		Z002E0007	Z007E0008	Z021E0008	Z025E0007
Z002E0009	Z007E0010	Z021E0009	Z025E0009		Z002E0009	Z007E0009	Z021E0010	Z025E0008		Z002E0009	Z007E0009	Z021E0009	Z025E0008
Z002E0010	Z007E0011	Z021E0010	Z025E0010		Z002E0010	Z007E0010	Z021E0011	Z025E0009		Z002E0010	Z007E0010	Z021E0010	Z025E0009
Z002E0011	Z007E0012	Z021E0011	Z025E0011		Z002E0011	Z007E0011	Z021E0012	Z025E0010		Z002E0011	Z007E0011	Z021E0011	Z025E0010
Z002E0013	Z007E0013	Z021E0013	Z025E0015		Z002E0012	Z007E0012	Z021E0013	Z025E0011		Z002E0012	Z007E0012	Z021E0012	Z025E0011
Z002E0014	Z007E0015	Z021E0014	Z025E0016		Z002E0013	Z007E0013	Z021E0014	Z025E0015		Z002E0013	Z007E0013	Z021E0013	Z025E0015
Z002E0015	Z007E0016	Z021E0016	Z025E0017		Z002E0014	Z007E0014	Z021E0015	Z025E0016		Z002E0014	Z007E0014	Z021E0014	Z025E0016
Z002E0016	Z007E0017	Z021E0017	Z025E0018		Z002E0015	Z007E0015	Z021E0017	Z025E0017		Z002E0015	Z007E0015	Z021E0015	Z025E0017
Z002E0017	Z007E0019	Z021E0019	Z025E0019		Z002E0016	Z007E0016	Z021E0019	Z025E0018		Z002E0016	Z007E0016	Z021E0016	Z025E0018
Z002E0018	Z007E0020	Z021E0023	Z025E0020		Z002E0017	Z007E0017	Z021E0023	Z025E0019		Z002E0017	Z007E0017	Z021E0017	Z025E0019
Z002E0019	Z007E0021	Z021E0025	Z025E0021		Z002E0018	Z007E0019	Z021E0025	Z025E0020		Z002E0018	Z007E0019	Z021E0019	Z025E0020
Z002E0020	Z007E0022	Z021E0026	Z025E0022		Z002E0019	Z007E0020	Z021E0026	Z025E0021		Z002E0019	Z007E0020	Z021E0023	Z025E0021
Z002E0021	Z007E0023	Z021E0027	Z025E0023		Z002E0020	Z007E0021	Z021E0027	Z025E0022		Z002E0020	Z007E0021	Z021E0025	Z025E0022
Z002E0022	Z007E0024	Z021E0029	Z025E0024		Z002E0021	Z007E0022	Z021E0029	Z025E0023		Z002E0021	Z007E0022	Z021E0026	Z025E0023
Z002E0023	Z007E0025	Z021E0032	Z025E0025		Z002E0022	Z007E0023	Z021E0030	Z025E0024		Z002E0022	Z007E0023	Z021E0027	Z025E0024
Z002E0026	Z007E0026	Z021E0033	Z025E0026		Z002E0023	Z007E0024	Z021E0032	Z025E0025		Z002E0023	Z007E0024	Z021E0029	Z025E0025
Z002E0027	Z007E0028	Z021E0034	Z025E0027		Z002E0025	Z007E0025	Z021E0033	Z025E0026		Z002E0025	Z007E0025	Z021E0030	Z025E0026
Z002E0028	Z007E0029	Z021E0035	Z025E0028		Z002E0026	Z007E0026	Z021E0034	Z025E0028		Z002E0026	Z007E0026	Z021E0032	Z025E0027
Z002E0029	Z007E0030	Z021E0036	Z025E0029		Z002E0027	Z007E0027	Z021E0035	Z025E0029		Z002E0027	Z007E0027	Z021E0033	Z025E0028
Z002E0030	Z007E0031	Z021E0037	Z025E0030		Z002E0028	Z007E0028	Z021E0037	Z025E0030		Z002E0028	Z007E0028	Z021E0034	Z025E0029
Z002E0031	Z007E0032	Z021E0038	Z025E0032		Z002E0029	Z007E0029	Z021E0038	Z025E0032		Z002E0029	Z007E0029	Z021E0035	Z025E0030
Z002E0033	Z007E0033	Z021E0039	Z025E0033		Z002E0030	Z007E0030	Z021E0039	Z025E0033		Z002E0030	Z007E0030	Z021E0036	Z025E0032
Z002E0034	Z007E0034	Z021E0040	Z025E0034		Z002E0031	Z007E0031	Z021E0040	Z025E0034		Z002E0031	Z007E0031	Z021E0037	Z025E0033
Z002E0035	Z007E0036	Z021E0041	Z025E0035		Z002E0032	Z007E0032	Z021E0041	Z025E0035		Z002E0032	Z007E0032	Z021E0038	Z025E0034
Z002E0036	Z007E0037	Z021E0042	Z025E0036		Z002E0033	Z007E0033	Z021E0042	Z025E0036		Z002E0033	Z007E0033	Z021E0039	Z025E0035
Z002E0037	Z007E0038	Z021E0043	Z025E0037		Z002E0034	Z007E0034	Z021E0043	Z025E0037		Z002E0034	Z007E0034	Z021E0040	Z025E0036
Z002E0038	Z007E0039	Z021E0044	Z025E0038		Z002E0035	Z007E0036	Z021E0044	Z025E0038		Z002E0035	Z007E0036	Z021E0041	Z025E0037
Z002E0039	Z007E0040	Z021E0045	Z025E0039		Z002E0036	Z007E0037	Z021E0045	Z025E0039		Z002E0036	Z007E0037	Z021E0042	Z025E0038
Z002E0040	Z007E0041	Z021E0046	Z025E0041		Z002E0037	Z007E0038	Z021E0046	Z025E0041		Z002E0037	Z007E0038	Z021E0043	Z025E0039
Z002E0041	Z007E0042	Z021E0047	Z025E0042		Z002E0038	Z007E0039	Z021E0047	Z025E0042		Z002E0038	Z007E0039	Z021E0044	Z025E0041
Z002E0042	Z007E0043	Z021E0048	Z025E0043		Z002E0039	Z007E0040	Z021E0048	Z025E0044		Z002E0039	Z007E0040	Z021E0045	Z025E0042
Z002E0047	Z007E0044	Z021E0049	Z025E0044		Z002E0040	Z007E0041	Z021E0049	Z025E0045		Z002E0040	Z007E0041	Z021E0046	Z025E0043
Z002E0048	Z007E0045	Z021E0051	Z025E0045		Z002E0041	Z007E0042	Z021E0051	Z025E0046		Z002E0041	Z007E0042	Z021E0047	Z025E0044
Z002E0049	Z007E0046	Z021E0053	Z025E0046		Z002E0042	Z007E0043	Z021E0053	Z025E0047		Z002E0042	Z007E0043	Z021E0048	Z025E0045
Z002E0050	Z007E0048	Z021E0054	Z025E0047		Z002E0043	Z007E0044	Z021E0054	Z025E0048		Z002E0043	Z007E0044	Z021E0049	Z025E0046
Z002E0051	Z007E0049	Z021E0056	Z025E0048		Z002E0044	Z007E0045	Z021E0056	Z025E0049		Z002E0044	Z007E0045	Z021E0051	Z025E0047
Z002E0053	Z007E0050	Z021E0057	Z025E0049		Z002E0047	Z007E0046	Z021E0057	Z025E0050		Z002E0047	Z007E0046	Z021E0053	Z025E0048
Z002E0054	Z007E0051	Z021E0058	Z025E0050		Z002E0048	Z007E0047	Z021E0058	Z025E0052		Z002E0048	Z007E0047	Z021E0054	Z025E0049
Z002E0055	Z007E0053	Z021E0060	Z025E0052		Z002E0049	Z007E0048	Z021E0060	Z025E0053		Z002E0049	Z007E0048	Z021E0056	Z025E0050
Z002E0056	Z007E0054	Z021E0062	Z025E0053		Z002E0050	Z007E0049	Z021E0062	Z025E0054		Z002E0050	Z007E0049	Z021E0057	Z025E0052
Z002E0057	Z007E0056	Z021E0063	Z025E0054		Z002E0051	Z007E0050	Z021E0063	Z025E0055		Z002E0051	Z007E0050	Z021E0058	Z025E0053
Z002E0058	Z007E0058	Z021E0064	Z025E0055		Z002E0053	Z007E0051	Z021E0064	Z025E0056		Z002E0053	Z007E0051	Z021E0060	Z025E0054
Z002E0059	Z007E0059	Z021E0065	Z025E0056		Z002E0054	Z007E0052	Z021E0065	Z025E0057		Z002E0054	Z007E0052	Z021E0062	Z025E0055
Z002E0060	Z007E0060	Z021E0069	Z025E0057		Z002E0055	Z007E0053	Z021E0069	Z025E0058		Z002E0055	Z007E0053	Z021E0063	Z025E0056
Z002E0061	Z007E0061	Z021E0070	Z025E0058		Z002E0056	Z007E0054	Z021E0070	Z025E0060		Z002E0056	Z007E0054	Z021E0064	Z025E0057
Z002E0062	Z007E0062	Z021E0071	Z025E0060		Z002E0057	Z007E0055	Z021E0071	Z025E0061		Z002E0057	Z007E0055	Z021E0065	Z025E0058
Z002E0063	Z007E0063	Z021E0072	Z025E0061		Z002E0058	Z007E0056	Z021E0072	Z025E0063		Z002E0058	Z007E0056	Z021E0069	Z025E0060
Z002E0065	Z007E0066	Z021E0074	Z025E0063		Z002E0059	Z007E0058	Z021E0074	Z025E0064		Z002E0059	Z007E0058	Z021E0070	Z025E0061
Z002E0066	Z007E0067	Z021E0075	Z025E0064		Z002E0060	Z007E0060	Z021E0075	Z025E0065		Z002E0060	Z007E0059	Z021E0071	Z025E0063
Z002E0068	Z007E0071	Z021E0076	Z025E0065		Z002E0061	Z007E0061	Z021E0076	Z025E0066		Z002E0061	Z007E0060	Z021E0072	Z025E0064
Z002E0069	Z007E0072	Z021E0077	Z025E0066		Z002E0062	Z007E0062	Z021E0077	Z025E0067		Z002E0062	Z007E0061	Z021E0074	Z025E0065
Z002E0070	Z007E0073	Z021E0078	Z025E0067		Z002E0063	Z007E0063	Z021E0078	Z025E0069		Z002E0063	Z007E0062	Z021E0075	Z025E0066
Z002E0071	Z007E0074	Z021E0079	Z025E0069		Z002E0064	Z007E0064	Z021E0079	Z025E0070		Z002E0064	Z007E0063	Z021E0076	Z025E0067
Z002E0072	Z007E0076	Z021E0080	Z025E0070		Z002E0065	Z007E0065	Z021E0081	Z025E0073		Z002E0065	Z007E0064	Z021E0077	Z025E0069
Z002E0073	Z007E0077	Z021E0081	Z025E0073		Z002E0066	Z007E0066	Z021E0082	Z025E0074		Z002E0066	Z007E0065	Z021E0078	Z025E0070
Z002E0074	Z007E0078	Z021E0082	Z025E0074		Z002E0068	Z007E0067	Z021E0083	Z025E0075		Z002E0068	Z007E0066	Z021E0079	Z025E0073
Z002E0076	Z007E0079	Z021E0083	Z025E0076		Z002E0069	Z007E0069	Z021E0084	Z025E0076		Z002E0069	Z007E0067	Z021E0080	Z025E0074
Z002E0077	Z007E0080	Z021E0084	Z025E0077		Z002E0070	Z007E0070	Z021E0085	Z025E0077		Z002E0070	Z007E0069	Z021E0081	Z025E0075
Z002E0078	Z007E0081	Z021E0085	Z025E0078		Z002E0071	Z007E0071	Z021E0086	Z025E0078		Z002E0071	Z007E0070	Z021E0082	Z025E0076
Z002E0081	Z007E0082	Z021E0087	Z025E0079		Z002E0072	Z007E0072	Z021E0087	Z025E0079		Z002E0072	Z007E0071	Z021E0083	Z025E0077
Z002E0082	Z007E0084	Z021E0088	Z025E0080		Z002E0073	Z007E0073	Z021E0088	Z025E0080		Z002E0073	Z007E0072	Z021E0084	Z025E0078
Z002E0083	Z007E0087	Z021E0089	Z025E0081		Z002E0074	Z007E0074	Z021E0089	Z025E0081		Z002E0074	Z007E0073	Z021E0085	Z025E0079
Z002E0084	Z007E0088	Z021E0090	Z025E0082		Z002E0076	Z007E0075	Z021E0090	Z025E0082		Z002E0076	Z007E0074	Z021E0086	Z025E0080
Z002E0085	Z007E0089	Z021E0091	Z025E0083		Z002E0077	Z007E0076	Z021E0091	Z025E0083		Z002E0077	Z007E0075	Z021E0087	Z025E0081
Z002E0086	Z007E0090	Z021E0093	Z025E0084		Z002E0079	Z007E0077	Z021E0092	Z025E0084		Z002E0078	Z007E0076	Z021E0088	Z025E0082
Z002E0087	Z007E0091	Z021E0096	Z025E0085		Z002E0080	Z007E0078	Z021E0093	Z025E0085		Z002E0079	Z007E0077	Z021E0089	Z025E0083
Z002E0088	Z007E0092	Z021E0097	Z025E0086		Z002E0081	Z007E0079	Z021E0094	Z025E0086		Z002E0080	Z007E0078	Z021E0090	Z025E0084
Z002E0089	Z007E0093	Z021E0098	Z025E0087		Z002E0082	Z007E0080	Z021E0096	Z025E0087		Z002E0081	Z007E0079	Z021E0091	Z025E0085
Z002E0090	Z007E0094	Z021E0101	Z025E0088		Z002E0083	Z007E0081	Z021E0097	Z025E0088		Z002E0082	Z007E0080	Z021E0092	Z025E0086
Z002E0091	Z007E0095	Z021E0102	Z025E0091		Z002E0084	Z007E0082	Z021E0098	Z025E0090		Z002E0083	Z007E0081	Z021E0093	Z025E0087
Z002E0092	Z007E0096	Z021E0103	Z025E0092		Z002E0085	Z007E0083	Z021E0099	Z025E0091		Z002E0084	Z007E0082	Z021E0094	Z025E0088
Z002E0094	Z007E0097	Z021E0104	Z025E0094		Z002E0086	Z007E0084	Z021E0100	Z025E0092		Z002E0085	Z007E0083	Z021E0096	Z025E0090
Z002E0095	Z007E0098	Z021E0105	Z025E0095		Z002E0087	Z007E0087	Z021E0101	Z025E0093		Z002E0086	Z007E0084	Z021E0097	Z025E0091
Z002E0097	Z007E0099	Z021E0106	Z025E0096		Z002E0088	Z007E0088	Z021E0102	Z025E0094		Z002E0087	Z007E0087	Z021E0098	Z025E0092
Z002E0098	Z007E0100	Z021E0107	Z025E0098		Z002E0089	Z007E0089	Z021E0103	Z025E0098		Z002E0088	Z007E0088	Z021E0099	Z025E0093
Z002E0099	Z007E0101	Z021E0108	Z025E0101		Z002E0090	Z007E0090	Z021E0104	Z025E0099		Z002E0089	Z007E0089	Z021E0100	Z025E0094
Z002E0100	Z007E0102	Z021E0109	Z025E0102		Z002E0091	Z007E0091	Z021E0105	Z025E0101		Z002E0090	Z007E0090	Z021E0101	Z025E0095
Z002E0101	Z007E0104	Z021E0110	Z025E0103		Z002E0092	Z007E0092	Z021E0106	Z025E0102		Z002E0091	Z007E0091	Z021E0102	Z025E0096
Z002E0103	Z007E0105	Z021E0111	Z025E0104		Z002E0094	Z007E0093	Z021E0107	Z025E0103		Z002E0092	Z007E0092	Z021E0103	Z025E0098
Z002E0104	Z007E0106	Z021E0112	Z025E0105		Z002E0095	Z007E0094	Z021E0108	Z025E0104		Z002E0094	Z007E0093	Z021E0104	Z025E0099
Z002E0105	Z007E0107	Z021E0113	Z025E0106		Z002E0096	Z007E0095	Z021E0109	Z025E0105		Z002E0095	Z007E0094	Z021E0105	Z025E0101
Z002E0106	Z007E0108	Z021E0114	Z025E0107		Z002E0097	Z007E0096	Z021E0110	Z025E0106		Z002E0096	Z007E0095	Z021E0106	Z025E0102
Z002E0107	Z007E0109	Z021E0115	Z025E0108		Z002E0098	Z007E0097	Z021E0111	Z025E0107		Z002E0097	Z007E0096	Z021E0107	Z025E0103
Z002E0108	Z007E0110	Z021E0116	Z025E0109		Z002E0099	Z007E0098	Z021E0112	Z025E0108		Z002E0098	Z007E0097	Z021E0108	Z025E0104
Z002E0109	Z007E0112	Z021E0117	Z025E0110		Z002E0100	Z007E0099	Z021E0113	Z025E0109		Z002E0099	Z007E0098	Z021E0109	Z025E0105
Z002E0110	Z007E0114	Z021E0118	Z025E0111		Z002E0101	Z007E0100	Z021E0114	Z025E0110		Z002E0100	Z007E0099	Z021E0110	Z025E0106
Z002E0111	Z007E0116	Z021E0119	Z025E0112		Z002E0102	Z007E0101	Z021E0115	Z025E0111		Z002E0101	Z007E0100	Z021E0111	Z025E0107
Z002E0112	Z007E0117	Z021E0120	Z025E0113		Z002E0103	Z007E0102	Z021E0116	Z025E0112		Z002E0102	Z007E0101	Z021E0112	Z025E0108
Z002E0113	Z007E0118	Z021E0121	Z025E0114		Z002E0104	Z007E0103	Z021E0117	Z025E0113		Z002E0103	Z007E0102	Z021E0113	Z025E0109
Z002E0114	Z007E0119	Z021E0122	Z025E0116		Z002E0105	Z007E0104	Z021E0118	Z025E0114		Z002E0104	Z007E0103	Z021E0114	Z025E0110
Z002E0117	Z007E0121	Z021E0123	Z025E0117		Z002E0106	Z007E0105	Z021E0119	Z025E0116		Z002E0105	Z007E0104	Z021E0115	Z025E0111
Z002E0120	Z007E0123	Z021E0124	Z025E0118		Z002E0107	Z007E0106	Z021E0120	Z025E0117		Z002E0106	Z007E0105	Z021E0116	Z025E0112
Z002E0122	Z007E0124	Z021E0125	Z025E0120		Z002E0108	Z007E0107	Z021E0121	Z025E0118		Z002E0107	Z007E0106	Z021E0117	Z025E0113
Z002E0123	Z007E0125	Z021E0127	Z025E0122		Z002E0109	Z007E0108	Z021E0122	Z025E0119		Z002E0108	Z007E0107	Z021E0118	Z025E0114
Z002E0124	Z007E0127	Z021E0128	Z025E0123		Z002E0110	Z007E0109	Z021E0123	Z025E0120		Z002E0109	Z007E0108	Z021E0119	Z025E0116
Z002E0125	Z007E0128	Z021E0129	Z025E0125		Z002E0111	Z007E0110	Z021E0124	Z025E0121		Z002E0110	Z007E0109	Z021E0120	Z025E0117
Z002E0132	Z007E0129	Z021E0130	Z025E0126		Z002E0112	Z007E0111	Z021E0125	Z025E0122		Z002E0111	Z007E0110	Z021E0121	Z025E0118
Z002E0133	Z007E0130	Z021E0131	Z025E0129		Z002E0113	Z007E0112	Z021E0126	Z025E0123		Z002E0112	Z007E0111	Z021E0122	Z025E0119
Z002E0135	Z007E0131	Z021E0133	Z025E0130		Z002E0114	Z007E0114	Z021E0127	Z025E0125		Z002E0113	Z007E0112	Z021E0123	Z025E0120
Z002E0136	Z007E0132	Z021E0134	Z025E0131		Z002E0116	Z007E0116	Z021E0128	Z025E0126		Z002E0114	Z007E0114	Z021E0124	Z025E0121
Z002E0137	Z007E0133	Z021E0135	Z025E0132		Z002E0117	Z007E0117	Z021E0129	Z025E0129		Z002E0116	Z007E0116	Z021E0125	Z025E0122
Z002E0138	Z007E0135	Z021E0136	Z025E0135		Z002E0118	Z007E0119	Z021E0130	Z025E0130		Z002E0117	Z007E0117	Z021E0126	Z025E0123
Z002E0139	Z007E0136	Z021E0137	Z025E0136		Z002E0119	Z007E0123	Z021E0131	Z025E0131		Z002E0118	Z007E0118	Z021E0127	Z025E0125
Z002E0140	Z007E0137	Z021E0138	Z025E0137		Z002E0120	Z007E0124	Z021E0133	Z025E0132		Z002E0119	Z007E0119	Z021E0128	Z025E0126
Z002E0141	Z007E0138	Z021E0139	Z025E0138		Z002E0121	Z007E0125	Z021E0134	Z025E0133		Z002E0120	Z007E0121	Z021E0129	Z025E0129
Z002E0143	Z007E0139	Z021E0140	Z025E0139		Z002E0122	Z007E0127	Z021E0135	Z025E0135		Z002E0121	Z007E0123	Z021E0130	Z025E0130
Z002E0144	Z007E0142	Z021E0141	Z025E0140		Z002E0123	Z007E0128	Z021E0136	Z025E0136		Z002E0122	Z007E0124	Z021E0131	Z025E0131
Z002E0145	Z007E0146	Z021E0146	Z025E0141		Z002E0124	Z007E0129	Z021E0137	Z025E0137		Z002E0123	Z007E0125	Z021E0133	Z025E0132
Z002E0146	Z007E0147	Z021E0147	Z025E0142		Z002E0125	Z007E0130	Z021E0138	Z025E0138		Z002E0124	Z007E0127	Z021E0134	Z025E0133
Z002E0148	Z007E0149	Z021E0148	Z025E0143		Z002E0132	Z007E0131	Z021E0139	Z025E0139		Z002E0125	Z007E0128	Z021E0135	Z025E0135
Z002E0149	Z007E0150	Z021E0149	Z025E0145		Z002E0133	Z007E0133	Z021E0140	Z025E0140		Z002E0132	Z007E0129	Z021E0136	Z025E0136
Z002E0150	Z007E0151	Z021E0150	Z025E0147		Z002E0134	Z007E0134	Z021E0141	Z025E0141		Z002E0133	Z007E0130	Z021E0137	Z025E0137
Z002E0151	Z007E0152	Z021E0151	Z025E0148		Z002E0135	Z007E0135	Z021E0144	Z025E0142		Z002E0134	Z007E0131	Z021E0138	Z025E0138
Z002E0155	Z007E0153	Z021E0152	Z025E0150		Z002E0136	Z007E0136	Z021E0145	Z025E0143		Z002E0135	Z007E0132	Z021E0139	Z025E0139
Z002E0156	Z007E0155	Z021E0153	Z025E0151		Z002E0137	Z007E0138	Z021E0146	Z025E0145		Z002E0136	Z007E0133	Z021E0140	Z025E0140
Z002E0157	Z007E0156	Z021E0154	Z025E0152		Z002E0138	Z007E0139	Z021E0147	Z025E0147		Z002E0137	Z007E0134	Z021E0141	Z025E0141
Z002E0158	Z007E0157	Z021E0156	Z025E0153		Z002E0139	Z007E0140	Z021E0148	Z025E0148		Z002E0138	Z007E0135	Z021E0144	Z025E0142
Z002E0161	Z007E0158	Z021E0157	Z025E0155		Z002E0140	Z007E0141	Z021E0149	Z025E0150		Z002E0139	Z007E0136	Z021E0145	Z025E0143
Z002E0163	Z007E0159	Z021E0158	Z025E0156		Z002E0141	Z007E0142	Z021E0150	Z025E0151		Z002E0140	Z007E0137	Z021E0146	Z025E0145
Z002E0164	Z007E0160	Z021E0159	Z025E0157		Z002E0144	Z007E0143	Z021E0152	Z025E0152		Z002E0141	Z007E0138	Z021E0147	Z025E0147
Z002E0165	Z007E0161	Z021E0160	Z025E0158		Z002E0145	Z007E0146	Z021E0153	Z025E0153		Z002E0143	Z007E0139	Z021E0148	Z025E0148
Z002E0166	Z007E0162	Z021E0162	Z025E0159		Z002E0146	Z007E0147	Z021E0154	Z025E0154		Z002E0144	Z007E0140	Z021E0149	Z025E0150
Z002E0167	Z007E0163	Z021E0163	Z025E0160		Z002E0148	Z007E0148	Z021E0156	Z025E0155		Z002E0145	Z007E0141	Z021E0150	Z025E0151
Z002E0168	Z007E0164	Z021E0164	Z025E0161		Z002E0149	Z007E0149	Z021E0157	Z025E0157		Z002E0146	Z007E0142	Z021E0151	Z025E0152
Z002E0169	Z007E0165	Z021E0166	Z025E0163		Z002E0150	Z007E0150	Z021E0158	Z025E0158		Z002E0148	Z007E0143	Z021E0152	Z025E0153
Z002E0170	Z007E0166	Z021E0167	Z025E0164		Z002E0151	Z007E0151	Z021E0159	Z025E0159		Z002E0149	Z007E0146	Z021E0153	Z025E0154
Z002E0172	Z007E0167	Z021E0169	Z025E0165		Z002E0152	Z007E0152	Z021E0160	Z025E0160		Z002E0150	Z007E0147	Z021E0154	Z025E0155
Z002E0173	Z007E0169	Z021E0170	Z025E0166		Z002E0153	Z007E0153	Z021E0162	Z025E0161		Z002E0151	Z007E0148	Z021E0156	Z025E0156
Z002E0175	Z007E0170	Z021E0172	Z025E0168		Z002E0155	Z007E0155	Z021E0163	Z025E0163		Z002E0152	Z007E0149	Z021E0157	Z025E0157
Z002E0176	Z007E0171	Z021E0173	Z025E0169		Z002E0156	Z007E0156	Z021E0166	Z025E0164		Z002E0153	Z007E0150	Z021E0158	Z025E0158
Z002E0178	Z007E0172	Z021E0174	Z025E0170		Z002E0157	Z007E0157	Z021E0167	Z025E0165		Z002E0155	Z007E0151	Z021E0159	Z025E0159
Z002E0179	Z007E0174	Z021E0178	Z025E0171		Z002E0158	Z007E0158	Z021E0169	Z025E0166		Z002E0156	Z007E0152	Z021E0160	Z025E0160
Z002E0180	Z007E0175	Z021E0179	Z025E0172		Z002E0161	Z007E0159	Z021E0170	Z025E0168		Z002E0157	Z007E0153	Z021E0162	Z025E0161
Z002E0181	Z007E0176	Z021E0180	Z025E0174		Z002E0162	Z007E0160	Z021E0172	Z025E0169		Z002E0158	Z007E0155	Z021E0163	Z025E0163
Z002E0183	Z007E0177	Z021E0181	Z025E0175		Z002E0163	Z007E0161	Z021E0173	Z025E0170		Z002E0161	Z007E0156	Z021E0164	Z025E0164
Z002E0184	Z007E0178	Z021E0182	Z025E0176		Z002E0164	Z007E0162	Z021E0174	Z025E0171		Z002E0162	Z007E0157	Z021E0166	Z025E0165
Z002E0186	Z007E0179	Z021E0183	Z025E0177		Z002E0165	Z007E0163	Z021E0177	Z025E0172		Z002E0163	Z007E0158	Z021E0167	Z025E0166
Z002E0188	Z007E0180	Z021E0184	Z025E0178		Z002E0166	Z007E0164	Z021E0178	Z025E0173		Z002E0164	Z007E0159	Z021E0169	Z025E0168
Z002E0189	Z007E0181	Z021E0185	Z025E0179		Z002E0167	Z007E0165	Z021E0179	Z025E0174		Z002E0165	Z007E0160	Z021E0170	Z025E0169
Z002E0190	Z007E0183	Z021E0188	Z025E0180		Z002E0168	Z007E0166	Z021E0180	Z025E0176		Z002E0166	Z007E0161	Z021E0172	Z025E0170
Z002E0191	Z007E0184	Z021E0189	Z025E0182		Z002E0169	Z007E0167	Z021E0181	Z025E0177		Z002E0167	Z007E0162	Z021E0173	Z025E0171
Z002E0192	Z007E0185	Z021E0190	Z025E0183		Z002E0170	Z007E0169	Z021E0182	Z025E0178		Z002E0168	Z007E0163	Z021E0174	Z025E0172
Z002E0193	Z007E0186	Z021E0191	Z025E0184		Z002E0171	Z007E0170	Z021E0183	Z025E0179		Z002E0169	Z007E0164	Z021E0176	Z025E0173
Z002E0194	Z007E0187	Z021E0192	Z025E0186		Z002E0172	Z007E0171	Z021E0184	Z025E0180		Z002E0170	Z007E0165	Z021E0177	Z025E0174
Z002E0195	Z007E0188	Z021E0193	Z025E0187		Z002E0173	Z007E0172	Z021E0185	Z025E0182		Z002E0171	Z007E0166	Z021E0178	Z025E0175
Z002E0198	Z007E0189	Z021E0194	Z025E0188		Z002E0175	Z007E0173	Z021E0186	Z025E0183		Z002E0172	Z007E0167	Z021E0179	Z025E0176
Z002E0199	Z007E0191	Z021E0195	Z025E0189		Z002E0176	Z007E0174	Z021E0187	Z025E0184		Z002E0173	Z007E0169	Z021E0180	Z025E0177
Z002E0200	Z007E0192	Z021E0196	Z025E0190		Z002E0178	Z007E0175	Z021E0188	Z025E0185		Z002E0175	Z007E0170	Z021E0181	Z025E0178
Z002E0207	Z007E0193	Z021E0197	Z025E0192		Z002E0179	Z007E0176	Z021E0189	Z025E0186		Z002E0176	Z007E0171	Z021E0182	Z025E0179
Z002E0217	Z007E0195	Z021E0199	Z025E0193		Z002E0180	Z007E0177	Z021E0190	Z025E0187		Z002E0178	Z007E0172	Z021E0183	Z025E0180
	Z007E0197	Z021E0205	Z025E0194		Z002E0181	Z007E0178	Z021E0191	Z025E0188		Z002E0179	Z007E0173	Z021E0184	Z025E0182
	Z007E0198	Z021E0216	Z025E0195		Z002E0183	Z007E0179	Z021E0192	Z025E0189		Z002E0180	Z007E0174	Z021E0185	Z025E0183
	Z007E0199	Z021E0239	Z025E0197		Z002E0184	Z007E0180	Z021E0193	Z025E0190		Z002E0181	Z007E0175	Z021E0186	Z025E0184
	Z007E0200		Z025E0198		Z002E0186	Z007E0181	Z021E0194	Z025E0192		Z002E0183	Z007E0176	Z021E0187	Z025E0185
			Z025E0199		Z002E0188	Z007E0182	Z021E0195	Z025E0193		Z002E0184	Z007E0177	Z021E0188	Z025E0186
			Z025E0200		Z002E0189	Z007E0183	Z021E0196	Z025E0194		Z002E0186	Z007E0178	Z021E0189	Z025E0187
			Z025E0211		Z002E0190	Z007E0184	Z021E0197	Z025E0195		Z002E0188	Z007E0179	Z021E0190	Z025E0188
			Z025E0213		Z002E0191	Z007E0185	Z021E0198	Z025E0197		Z002E0189	Z007E0180	Z021E0191	Z025E0189
			Z025E0218		Z002E0193	Z007E0186	Z021E0199	Z025E0198		Z002E0190	Z007E0181	Z021E0192	Z025E0190
					Z002E0194	Z007E0187	Z021E0205	Z025E0199		Z002E0191	Z007E0182	Z021E0193	Z025E0192
					Z002E0195	Z007E0188	Z021E0216	Z025E0200		Z002E0192	Z007E0183	Z021E0194	Z025E0193
					Z002E0198	Z007E0189	Z021E0239			Z002E0193	Z007E0184	Z021E0195	Z025E0194
					Z002E0199	Z007E0191				Z002E0194	Z007E0185	Z021E0196	Z025E0195
					Z002E0200	Z007E0192				Z002E0195	Z007E0186	Z021E0197	Z025E0197
					Z002E0207	Z007E0193				Z002E0198	Z007E0187	Z021E0198	Z025E0198
					Z002E0217	Z007E0195				Z002E0199	Z007E0188	Z021E0199	Z025E0199
						Z007E0197				Z002E0200	Z007E0189	Z021E0205	Z025E0200
						Z007E0198				Z002E0207	Z007E0191	Z021E0216
						Z007E0199				Z002E0217	Z007E0192	Z021E0239
						Z007E0200					Z007E0193
											Z007E0195
											Z007E0197
											Z007E0198
											Z007E0199
											Z007E0200

## Sheet: Table S2
Joint Linkage QTL Mapping Genotypes
RILs used in d13C Analysis
CML103	CML333	Nc358	Tx303
Z002E0001	Z007E0001	Z021E0001	Z025E0001
Z002E0002	Z007E0002	Z021E0002	Z025E0002
Z002E0003	Z007E0003	Z021E0003	Z025E0003
Z002E0004	Z007E0004	Z021E0004	Z025E0004
Z002E0005	Z007E0005	Z021E0005	Z025E0005
Z002E0006	Z007E0007	Z021E0006	Z025E0006
Z002E0007	Z007E0009	Z021E0008	Z025E0007
Z002E0009	Z007E0010	Z021E0009	Z025E0009
Z002E0010	Z007E0011	Z021E0010	Z025E0010
Z002E0011	Z007E0012	Z021E0011	Z025E0011
Z002E0013	Z007E0013	Z021E0013	Z025E0015
Z002E0014	Z007E0015	Z021E0014	Z025E0016
Z002E0015	Z007E0016	Z021E0016	Z025E0017
Z002E0016	Z007E0017	Z021E0017	Z025E0018
Z002E0017	Z007E0019	Z021E0019	Z025E0019
Z002E0018	Z007E0020	Z021E0023	Z025E0020
Z002E0019	Z007E0021	Z021E0025	Z025E0021
Z002E0020	Z007E0022	Z021E0026	Z025E0022
Z002E0021	Z007E0023	Z021E0027	Z025E0023
Z002E0022	Z007E0024	Z021E0029	Z025E0024
Z002E0023	Z007E0025	Z021E0032	Z025E0025
Z002E0026	Z007E0026	Z021E0033	Z025E0026
Z002E0027	Z007E0029	Z021E0034	Z025E0027
Z002E0028	Z007E0030	Z021E0035	Z025E0028
Z002E0029	Z007E0031	Z021E0036	Z025E0029
Z002E0030	Z007E0032	Z021E0037	Z025E0030
Z002E0031	Z007E0033	Z021E0038	Z025E0032
Z002E0033	Z007E0034	Z021E0039	Z025E0034
Z002E0034	Z007E0036	Z021E0040	Z025E0035
Z002E0035	Z007E0037	Z021E0041	Z025E0036
Z002E0036	Z007E0038	Z021E0042	Z025E0037
Z002E0037	Z007E0039	Z021E0043	Z025E0038
Z002E0038	Z007E0040	Z021E0044	Z025E0039
Z002E0039	Z007E0041	Z021E0045	Z025E0041
Z002E0040	Z007E0042	Z021E0046	Z025E0042
Z002E0041	Z007E0043	Z021E0047	Z025E0043
Z002E0042	Z007E0044	Z021E0048	Z025E0044
Z002E0047	Z007E0045	Z021E0049	Z025E0045
Z002E0048	Z007E0046	Z021E0051	Z025E0046
Z002E0049	Z007E0048	Z021E0053	Z025E0047
Z002E0050	Z007E0049	Z021E0054	Z025E0048
Z002E0051	Z007E0050	Z021E0057	Z025E0049
Z002E0053	Z007E0051	Z021E0058	Z025E0050
Z002E0054	Z007E0053	Z021E0060	Z025E0052
Z002E0055	Z007E0054	Z021E0062	Z025E0053
Z002E0056	Z007E0056	Z021E0063	Z025E0054
Z002E0057	Z007E0058	Z021E0064	Z025E0055
Z002E0058	Z007E0059	Z021E0065	Z025E0056
Z002E0059	Z007E0060	Z021E0069	Z025E0057
Z002E0060	Z007E0061	Z021E0070	Z025E0058
Z002E0061	Z007E0062	Z021E0071	Z025E0060
Z002E0062	Z007E0063	Z021E0072	Z025E0061
Z002E0063	Z007E0066	Z021E0074	Z025E0063
Z002E0065	Z007E0067	Z021E0075	Z025E0064
Z002E0066	Z007E0071	Z021E0076	Z025E0065
Z002E0068	Z007E0072	Z021E0077	Z025E0066
Z002E0069	Z007E0073	Z021E0078	Z025E0067
Z002E0070	Z007E0074	Z021E0079	Z025E0069
Z002E0071	Z007E0076	Z021E0080	Z025E0070
Z002E0072	Z007E0077	Z021E0081	Z025E0073
Z002E0073	Z007E0078	Z021E0082	Z025E0074
Z002E0074	Z007E0079	Z021E0083	Z025E0076
Z002E0076	Z007E0080	Z021E0084	Z025E0077
Z002E0077	Z007E0081	Z021E0085	Z025E0078
Z002E0078	Z007E0082	Z021E0087	Z025E0079
Z002E0081	Z007E0084	Z021E0088	Z025E0080
Z002E0082	Z007E0087	Z021E0089	Z025E0081
Z002E0083	Z007E0088	Z021E0090	Z025E0082
Z002E0084	Z007E0089	Z021E0091	Z025E0083
Z002E0085	Z007E0090	Z021E0093	Z025E0084
Z002E0086	Z007E0091	Z021E0096	Z025E0085
Z002E0087	Z007E0092	Z021E0097	Z025E0086
Z002E0088	Z007E0093	Z021E0101	Z025E0087
Z002E0089	Z007E0094	Z021E0102	Z025E0088
Z002E0090	Z007E0095	Z021E0103	Z025E0091
Z002E0091	Z007E0096	Z021E0104	Z025E0092
Z002E0092	Z007E0097	Z021E0105	Z025E0094
Z002E0094	Z007E0098	Z021E0106	Z025E0095
Z002E0095	Z007E0099	Z021E0108	Z025E0096
Z002E0097	Z007E0100	Z021E0109	Z025E0101
Z002E0098	Z007E0101	Z021E0110	Z025E0102
Z002E0099	Z007E0102	Z021E0111	Z025E0103
Z002E0100	Z007E0104	Z021E0112	Z025E0104
Z002E0101	Z007E0105	Z021E0113	Z025E0105
Z002E0103	Z007E0106	Z021E0114	Z025E0106
Z002E0104	Z007E0107	Z021E0115	Z025E0107
Z002E0105	Z007E0108	Z021E0116	Z025E0108
Z002E0106	Z007E0109	Z021E0117	Z025E0109
Z002E0107	Z007E0110	Z021E0118	Z025E0110
Z002E0108	Z007E0112	Z021E0119	Z025E0111
Z002E0109	Z007E0114	Z021E0120	Z025E0112
Z002E0110	Z007E0116	Z021E0121	Z025E0113
Z002E0111	Z007E0117	Z021E0122	Z025E0114
Z002E0112	Z007E0118	Z021E0123	Z025E0116
Z002E0113	Z007E0119	Z021E0124	Z025E0117
Z002E0114	Z007E0121	Z021E0125	Z025E0118
Z002E0117	Z007E0123	Z021E0127	Z025E0120
Z002E0120	Z007E0124	Z021E0128	Z025E0122
Z002E0122	Z007E0125	Z021E0129	Z025E0123
Z002E0123	Z007E0127	Z021E0130	Z025E0125
Z002E0124	Z007E0128	Z021E0131	Z025E0126
Z002E0125	Z007E0129	Z021E0133	Z025E0129
Z002E0132	Z007E0130	Z021E0134	Z025E0130
Z002E0133	Z007E0131	Z021E0135	Z025E0131
Z002E0135	Z007E0132	Z021E0136	Z025E0132
Z002E0136	Z007E0133	Z021E0137	Z025E0135
Z002E0137	Z007E0135	Z021E0138	Z025E0136
Z002E0138	Z007E0136	Z021E0139	Z025E0137
Z002E0139	Z007E0137	Z021E0140	Z025E0138
Z002E0140	Z007E0138	Z021E0141	Z025E0139
Z002E0141	Z007E0139	Z021E0146	Z025E0140
Z002E0143	Z007E0142	Z021E0147	Z025E0141
Z002E0144	Z007E0146	Z021E0148	Z025E0142
Z002E0145	Z007E0147	Z021E0149	Z025E0143
Z002E0146	Z007E0149	Z021E0150	Z025E0145
Z002E0148	Z007E0150	Z021E0151	Z025E0147
Z002E0149	Z007E0151	Z021E0152	Z025E0148
Z002E0150	Z007E0152	Z021E0153	Z025E0150
Z002E0151	Z007E0153	Z021E0156	Z025E0151
Z002E0155	Z007E0155	Z021E0157	Z025E0152
Z002E0156	Z007E0156	Z021E0158	Z025E0153
Z002E0157	Z007E0157	Z021E0159	Z025E0155
Z002E0158	Z007E0158	Z021E0160	Z025E0156
Z002E0161	Z007E0159	Z021E0162	Z025E0157
Z002E0163	Z007E0160	Z021E0163	Z025E0158
Z002E0164	Z007E0161	Z021E0164	Z025E0159
Z002E0165	Z007E0162	Z021E0166	Z025E0160
Z002E0166	Z007E0163	Z021E0167	Z025E0161
Z002E0167	Z007E0164	Z021E0169	Z025E0163
Z002E0168	Z007E0165	Z021E0170	Z025E0164
Z002E0169	Z007E0166	Z021E0172	Z025E0165
Z002E0170	Z007E0167	Z021E0173	Z025E0166
Z002E0172	Z007E0169	Z021E0174	Z025E0168
Z002E0173	Z007E0170	Z021E0178	Z025E0169
Z002E0175	Z007E0171	Z021E0179	Z025E0170
Z002E0176	Z007E0172	Z021E0180	Z025E0171
Z002E0178	Z007E0174	Z021E0181	Z025E0172
Z002E0179	Z007E0175	Z021E0183	Z025E0174
Z002E0180	Z007E0176	Z021E0184	Z025E0175
Z002E0181	Z007E0177	Z021E0185	Z025E0176
Z002E0183	Z007E0178	Z021E0188	Z025E0177
Z002E0184	Z007E0179	Z021E0189	Z025E0178
Z002E0186	Z007E0180	Z021E0190	Z025E0179
Z002E0188	Z007E0181	Z021E0191	Z025E0180
Z002E0189	Z007E0183	Z021E0192	Z025E0182
Z002E0190	Z007E0184	Z021E0193	Z025E0183
Z002E0191	Z007E0185	Z021E0194	Z025E0184
Z002E0192	Z007E0186	Z021E0195	Z025E0186
Z002E0193	Z007E0187	Z021E0196	Z025E0187
Z002E0194	Z007E0188	Z021E0197	Z025E0188
Z002E0195	Z007E0189	Z021E0199	Z025E0189
Z002E0198	Z007E0191		Z025E0190
Z002E0199	Z007E0192		Z025E0192
Z002E0200	Z007E0193		Z025E0193
	Z007E0195		Z025E0194
	Z007E0197		Z025E0195
	Z007E0198		Z025E0197
	Z007E0199		Z025E0198
	Z007E0200		Z025E0199
			Z025E0200

## Sheet: Table S3
GWAS Genotypes
Lines used in d13C Analysis
Accession	Line
PI 369437	80-2
Ames 26771	33-16
Ames 26604	38-11
NSL 30904	4226
PI 587130	4722
Ames 2336	52220
PI 415082	4554 INBRED
PI 415086	4578 INBRED
NSL 30861	A
NSL 42873	A12
Ames 23389	A15
Ames 23396	A155
NSL 42878	A171
Ames 22443	A188
Ames 23402	A208
Ames 23405	A239
NSL 81596	A258
Ames 23417	A305
Ames 23421	A321
Ames 23422	A322
Ames 23423	A334
Ames 23424	A340
Ames 23427	A374
Ames 23429	A385
Ames 23430	A401
PI 221773	A415-1-3 INBRED
Ames 23435	A427
PI 587138	A554
Ames 23451	A572
Ames 23463	A627
PI 587140	A632
Ames 19309	A635
NSL 81597	A648
Ames 23482	A649
Ames 23484	A651
NSL 81599	A659
PI 607521	A661
PI 607522	A662
PI 607523	A663
Ames 23497	A673
Ames 23498	A674
PI 587142	A679
Ames 23503	A680
PI 587143	A682
NSL 42875	A71
Ames 22439	A73
PI 406130	A797NW
PI 561522	AR228
NSL 437933	AusTRCF 306238
NSL 65865	B10
PI 564852	B101
PI 594046	B103
PI 594047	B104
PI 594048	B105
PI 594049	B106
PI 597925	B107
PI 597926	B108
PI 597927	B109
NSL 65866	B14
PI 550461	B14A
Ames 27066	B164
PI 340855	B-18 INBR.FR.SUPERGOLD
PI 340860	B-28
PI 550467	B37
PI 603939	B42
PI 550454	B52
PI 550470	B54
PI 550440	B64
PI 550464	B66
PI 550465	B68
NSL 65863	B7
27M31203	B73
PI 608774	B75
PI 608765	B77
PI 608766	B79
NSL 65864	B8
PI 608767	B84
PI 608777	B85
PI 608768	B87
PI 550556	B88
PI 527699	B90
PI 527700	B91
PI 584528	B99
NSL 22983	C102
Ames 19284	C103
Ames 19313	C123
Ames 22016	C15
Ames 23507	C42
Ames 27067	C49A
Ames 22023	C68
Ames 24585	CG10
Ames 22441	CH157
Ames 27069	CH701-30
Ames 27021	CH753-4
Ames 27068	CH9
PI 427111	Chi-tan 120
CIze 21	CI 21E
CIze 28	CI 28A
Ames 21512	CI31A
Ames 26128	CI 40H
CIze 64	CI 64
CIze 91	CI 91B
Ames 27024	CL17
Ames 27025	CL18
Ames 27029	CL27
PI 587124	CM105
Ames 19316	CM174
Ames 27070	CM7
Ames 27031	CM99
Ames 27082	CML 108
CIMMYTMA 17654	CML 144
CIMMYTMA 17671	CML 161
CIMMYTMA 17686	CML 176
CIMMYTMA 17712	CML 202
Ames 27086	CML 218
Ames 27087	CML 220
PI 595542	CML 254
PI 595544	CML 264
PI 595565	CML 287
Ames 27097	CML 323
Ames 30861	CML 376
CIMMYTMA 28020	CML 421
CIMMYTMA 28043	CML 444
CIMMYTMA 28047	CML 448
CIMMYTMA 28050	CML 451
CIMMYTMA 28055	CML 456
CIMMYTMA 28087	CML 488
CIMMYTMA 28090	CML 491
CIMMYTMA 28104	CML 505
Ames 27079	CML 91
Ames 27105	CO106
Ames 27039	CO117
Ames 27106	CO125
Ames 27042	CO158
Ames 27043	CO192
Ames 27044	CO216
Ames 27046	CO236
Ames 27048	CO245
Ames 27107	CO255
Ames 27051	CO256
Ames 27052	CO257
Ames 27053	CO258
PI 601080	CR1HT
Ames 27057	CSJ3
PI 638551	DE3
PI 638552	DE4
PI 550558	DE811
Ames 27110	E2558W
Ames 2330	East 028
PI 427109	Eng-li Chih
Ames 27111	EP1
PI 257513	F115
Ames 27112	F2834T
NSL 22893	F44
PI 257507	F7
PI 257517	FC46
PI 600772	FR19
PI 340821	G22 T122
PI 340818	G3 T5a
PI 601037	G80
Ames 10256	GE129
Ames 10254	GE54
PI 550526	H110
Ames 26803	H113
Ames 22751	H114
Ames 26804	H121
Ames 26805	H122w
Ames 26806	H124w
Ames 26774	H14
Ames 26787	H49
Ames 26772	H5
Ames 26790	H52
Ames 26793	H71
PI 587128	H84
Ames 27114	H91
Ames 19319	H95
Ames 26797	H96
PI 587129	H99
PI 593008	Hi26
PI 593010	Hi28
PI 542777	HP72-11
Ames 2337	Huanyao
Ames 2339	Huobai
Ames 24589	I159
Ames 27115	I29
Ames 27117	Ia5125B
Ames 24575	IDS28
Ames 24576	IDS69
Ames 27119	Il 101T
Ames 27446	Il778d
PI 186197	INBRED 100
PI 186196	INBRED 109
PI 186199	INBRED 141
PI 186226	INBRED 305
PI 186227	INBRED 309
Ames 27122	K148
NSL 22630	K150
NSL 22634	K155
NSL 22632	K201
NSL 30038	K4
NSL 22635	K41
NSL 22628	K47
Ames 22754	K55
Ames 27121	K64
Ames 27125	Ki21
Ames 27126	Ki43
PI 591017	KO679Y
PI 391662	KUNG-70
Ames 27131	Ky226
PI 587136	Ky228
NSL 65872	L 289
NSL 65873	L317
PI 644101	LH1
PI 601079	LH123HT
Ames 27450	LH143 (Maintainer)
PI 600959	LH145
PI 601493	LH149
PI 600791	LH38
PI 600944	LH39
PI 601466	LH59
PI 601404	LH60
PI 601416	LH61
PI 601171	LH93
PI 601378	LP5
NSL 30867	M14
PI 558518	Mo15W
Ames 20116	Mo23W
PI 587144	Mo24W
Ames 28928	Mo28W
PI 558522	Mo3
Ames 28930	Mo30W
Ames 28937	Mo39
PI 583350	Mo45
PI 583352	Mo47
PI 558523	Mo5
PI 558516	Mo7
Ames 27136	Mo.G
PI 543916	Mp339
Ames 24727	MS106
Ames 24729	MS116
Ames 24706	MS12
Ames 24730	MS132
Ames 24733	MS142
Ames 24734	MS153
Ames 24742	MS211
Ames 24746	MS221
Ames 24747	MS222
Ames 24748	MS223
Ames 24749	MS224
Ames 24750	MS225
Ames 24751	MS226
Ames 24708	MS24A
Ames 24710	MS67
Ames 24713	MS72
Ames 20140	Mt42
PI 550567	N193
Ames 22755	N197
PI 568158	N199
PI 595366	N209
PI 595367	N215
PI 596355	N216
PI 596356	N217
PI 596357	N218
Ames 19321	N28
Ames 27138	N28Ht
PI 594050	N501
PI 604606	N527
PI 594080	N534
PI 594084	N538
PI 594088	N542
PI 594091	N545
Ames 27137	N6
PI 607512	N7A
Ames 12726	NC13
Ames 12729	NC222
Ames 12731	NC230
Ames 12732	NC232
Ames 12734	NC236
PI 550555	NC250
PI 520774	NC264
Ames 27261	NC298
Ames 27155	NC318
Ames 27166	NC340
Ames 27167	NC342
Ames 27168	NC344
Ames 27174	NC356
NSL 32723	ND1
PI 550553	ND101
NSL 32726	ND167
NSL 32728	ND230
PI 550489	ND245
PI 550490	ND246
PI 550503	ND247
PI 550532	ND251
PI 550573	ND260
PI 522250	ND262
PI 546494	ND265
NSL 32738	ND283
PI 303924	NO. 380
PI 542716	NP87
PI 610494	NY6371
PI 596506	OC19
NSL 28965	Oh33
NSL 28966	Oh40B
PI 587146	Oh7
NSL 65874	Os420
Ames 22756	Os426
PI 517968	Pa392
Ames 22757	Pa405
PI 517971	Pa468
Ames 27184	Pa762
PI 560081	Pa778
PI 517974	Pa880
PI 531083	Pa891
PI 601270	PHG29
PI 601008	PHG35
PI 600981	PHG39
PI 601318	PHG47
PI 601006	PHG50
PI 601319	PHG72
PI 601321	PHJ40
PI 601496	PHK76
PI 601497	PHN11
PI 601361	PHR36
PI 601498	PHT55
PI 601499	PHT77
PI 601500	PHV63
PI 601362	PHW17
PI 601322	PHZ51
NSL 30878	R101
NSL 30883	R113
NSL 30884	R134
Ames 19326	R168
NSL 30894	R177
NSL 30896	R181B
NSL 30902	R197
PI 531509	R225
PI 531510	R226
PI 531511	R227
PI 592734	R229
NSL 30868	R30
Ames 27187	R4
NSL 30869	R53
NSL 30872	R71
NSL 30876	R78
PI 535906	S 56
PI 533658	SD101
PI 533659	SD102
NSL 34374	SD15
PI 606768	SD40
PI 508277	SD42
PI 524969	SD44
PI 587132	Sg 1533
NSL 75979	SG 18
NSL 75980	SG 30A
PI 340827	T141
PI 340829	T146
PI 550522	T232
Ames 27190	T234
PI 340830	T242
PI 340819	T9
Ames 26022	Tr
PI 391678	TZU-CHIAO-HSI-WU 105
PI 369446	U 123
Ames 27191	U267Y
PI 587151	Va102
Ames 27192	Va14
Ames 19011	Va38
Ames 19014	Va52
Ames 27193	Va85
Ames 24989	Va99
Ames 19000	VaW6
Ames 8399	W117HT
PI 587154	W153R
PI 587155	W182BN
NSL 30053	W22
NSL 30060	W23
NSL 30064	W24
NSL 30071	W32
NSL 30073	W37A
PI 520770	W552
Ames 22767	W59E
Ames 30553	W601S
Ames 30555	W603S
Ames 30556	W604S
Ames 30557	W605S
PI 587152	W64A
NSL 30056	W703
Ames 30559	W802G
Ames 30560	W803G
Ames 30566	W809G
Ames 30567	W810G
Ames 30568	W811G
Ames 30569	W812G
Ames 30570	W813G
Ames 30571	W814G
Ames 30572	W815G
Ames 30573	W816G
Ames 30574	W817G
Ames 30575	W818G
Ames 30576	W819G
Ames 30577	W820G
Ames 30578	W821G
NSL 30065	W9
NSL 30066	WR3
PI 391680	WU-TAN-TZAO
Ames 26745	WXB6
PI 391672	YANG
Ames 2335	Ye 4
PI 391682	YE-CHI-HUNG
Ames 2331	Yellow 3-4
PI 391665	YING-55
Ames 2333	Yong 28

## Sheet: Table S4
Single Family Stepwise Regression for Elements
Element	Family	Step1 Marker#	Position (Chr,bp)	Step2 Marker#	Position (Chr,bp)	Step3 Marker#	Position (Chr,bp)	TPVE (%)
Boron	CML103	966***	7, 2922299	ns	-	ns	-	0.0843
	CML333	1201***	8, 167944635	ns	-	ns	-	0.1022
	NC358	1140***	8, 20220637	1141***	8, 20889060	ns	-	0.2179
Magnesium	CML103	1412***	10, 87208464	65***	1, 44658596	ns	-	0.178
	TX303	1370***	10, 2158570	85***	1, 80745886	ns	-	0.1883
	NC358	1279***	9, 20776304	1369***	10, 1862841	ns	-	0.1798
Phosporous	CML103	555***	4, 5218861	ns	-	ns	-	0.0794
	CML333	1083***	7, 172883402	ns	-	ns	-	0.0912
Sulfur	CML333	332***	2, 211968811	897***	6, 133795910	ns	-	0.1565
Potassium	TX303	7***	1, 3535205	ns	-	ns	-	0.1135
	NC358	17***	1, 6991738	ns	-	ns	-	0.0011
Iron	CML103	876***	6, 106632270	11***	1, 4918842	322**	2, 204099491	0.216
Manganese	CML103	1413***	10, 92791835	161***	1, 262609794	ns	-	0.181
	TX303	735***	5, 15581585	ns	-	ns	-	0.0898
	NC358	1324***	9, 143965280	ns	-	ns	-	0.1067
Cobalt	TX303	1006***	7, 41228241	ns	-	ns	-	0.0869
	NC358	411***	3, 10463455	ns	-	ns	-	0.0752
Copper	NC358	409***	3, 9542517	ns	-	ns	-	0.0827
Rubidium	NC358	492***	3, 208570183	ns	-	ns	-	0.0992
Strontium	CML103	272***	2, 27964842	ns	-	ns	-	0.0895
	CML333	998***	7, 14369495	ns	-	ns	-	0.1044
Molybdenum	CML103	1271***	9, 16503272	ns	-	ns	-	0.094
*TPVE: Total Percent of Variation Explained

## Sheet: Table S5
Weather Data
Month	Year	Avg. Air Temp. (oF)	Avg. Rel. Humidity (%)	Avg. Daily Precip. (inches)
April	30-Year Avg.	52.8 + 2.9	69.1 + 5.2	0.126 + 0.071
April	2015	54.6	63.7	0.124
April	2019	52.6	70.9	0.178
May	30-Year Avg.	63.5 + 3.3	70.7 + 7.0	0.156 + 0.073
May	2015	66.1	70	0.195
May	2019	63.7	75.7	0.167
June	30-Year Avg.	72.5 + 2.1	72.1 + 5.9	0.151 + 0.083
June	2015	72.5	79.5	0.3
June	2019	71.7	71.4	0.123
July	30-Year Avg.	75.2 + 2.7	75.6 + 5.7	0.137 + 0.086
July	2015	74	80.2	0.135
July	2019	77.3	72.9	0.074
